# Supplementary material for: Speech acoustic indices for differential diagnosis between Parkinson’s disease, multiple system atrophy and progressive supranuclear palsy
Source: PubMed Central journal article supplement (PMC9613976; doi:10.1038/s41531-022-00389-6), 2022-10-27
Supplement: 41531_2022_389_MOESM1_ESM.pdf [file 41531_2022_389_MOESM1_ESM.pdf]

**Supplementary Audio S1.** Audio sample of sustained phonation, syllable repetition and reading passage of representative patient with progressive supranuclear palsy (Richardson syndrome, male, 69 years, and symptom duration 3 years).

**Supplementary Audio S2.** Audio sample of sustained phonation, syllable repetition and reading passage of representative patient with multiple system atrophy (parkinsonian subtype female, 67 years, and symptom duration 5 years).

**Supplementary Audio S3.** Audio sample of sustained phonation, syllable repetition and reading passage of representative patient with Parkinson's disease (male, 63 years, and symptom duration 5 years)

**Supplementary Audio S4.** Audio sample of sustained phonation, syllable repetition and reading passage of representative healthy control subject (male and 65 years).
